# Supplementary material
Source: MDPI journal article supplement (https://www.mdpi.com/2075-4442/5/2/11)
Supplement: s1 [file s1]

Supplementary Materials: Chemical/Structural Modification of Canola Oil and Canola Biodiesel: Kinetic Studies and Biodegradability of the Alkoxides

Venu Babu Borugadda, Asish K. R. Somidi and Ajay K. Dalai


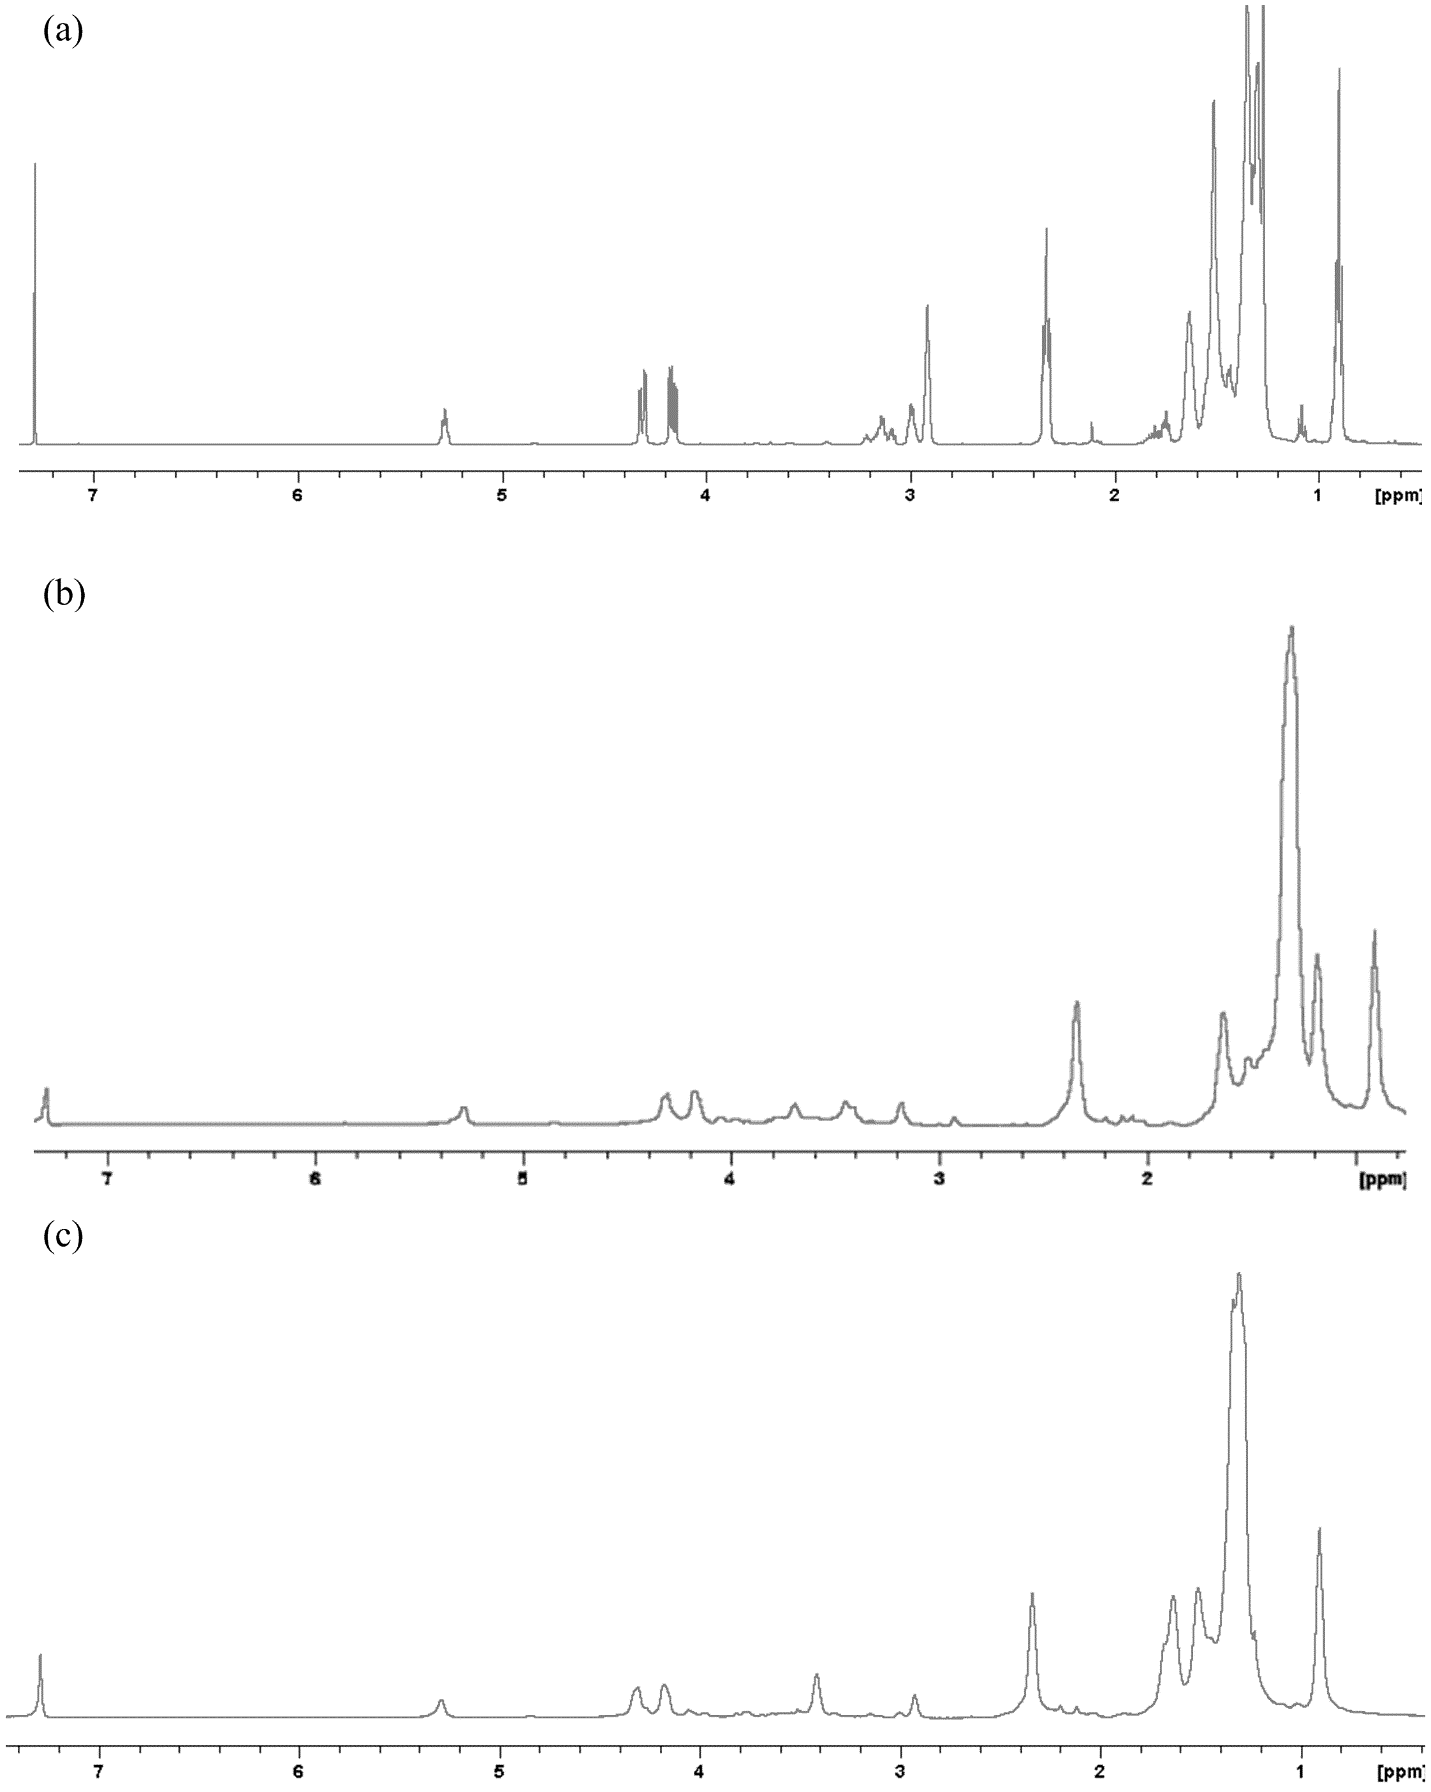


**Figure S1.** 1H NMR spectra of (**a**) Epoxidized canola oil; (**b**) 2-propanol derived canola oil biolubricant basestock and (**c**) tert-butanol derived canola oil biolubricant basestock.


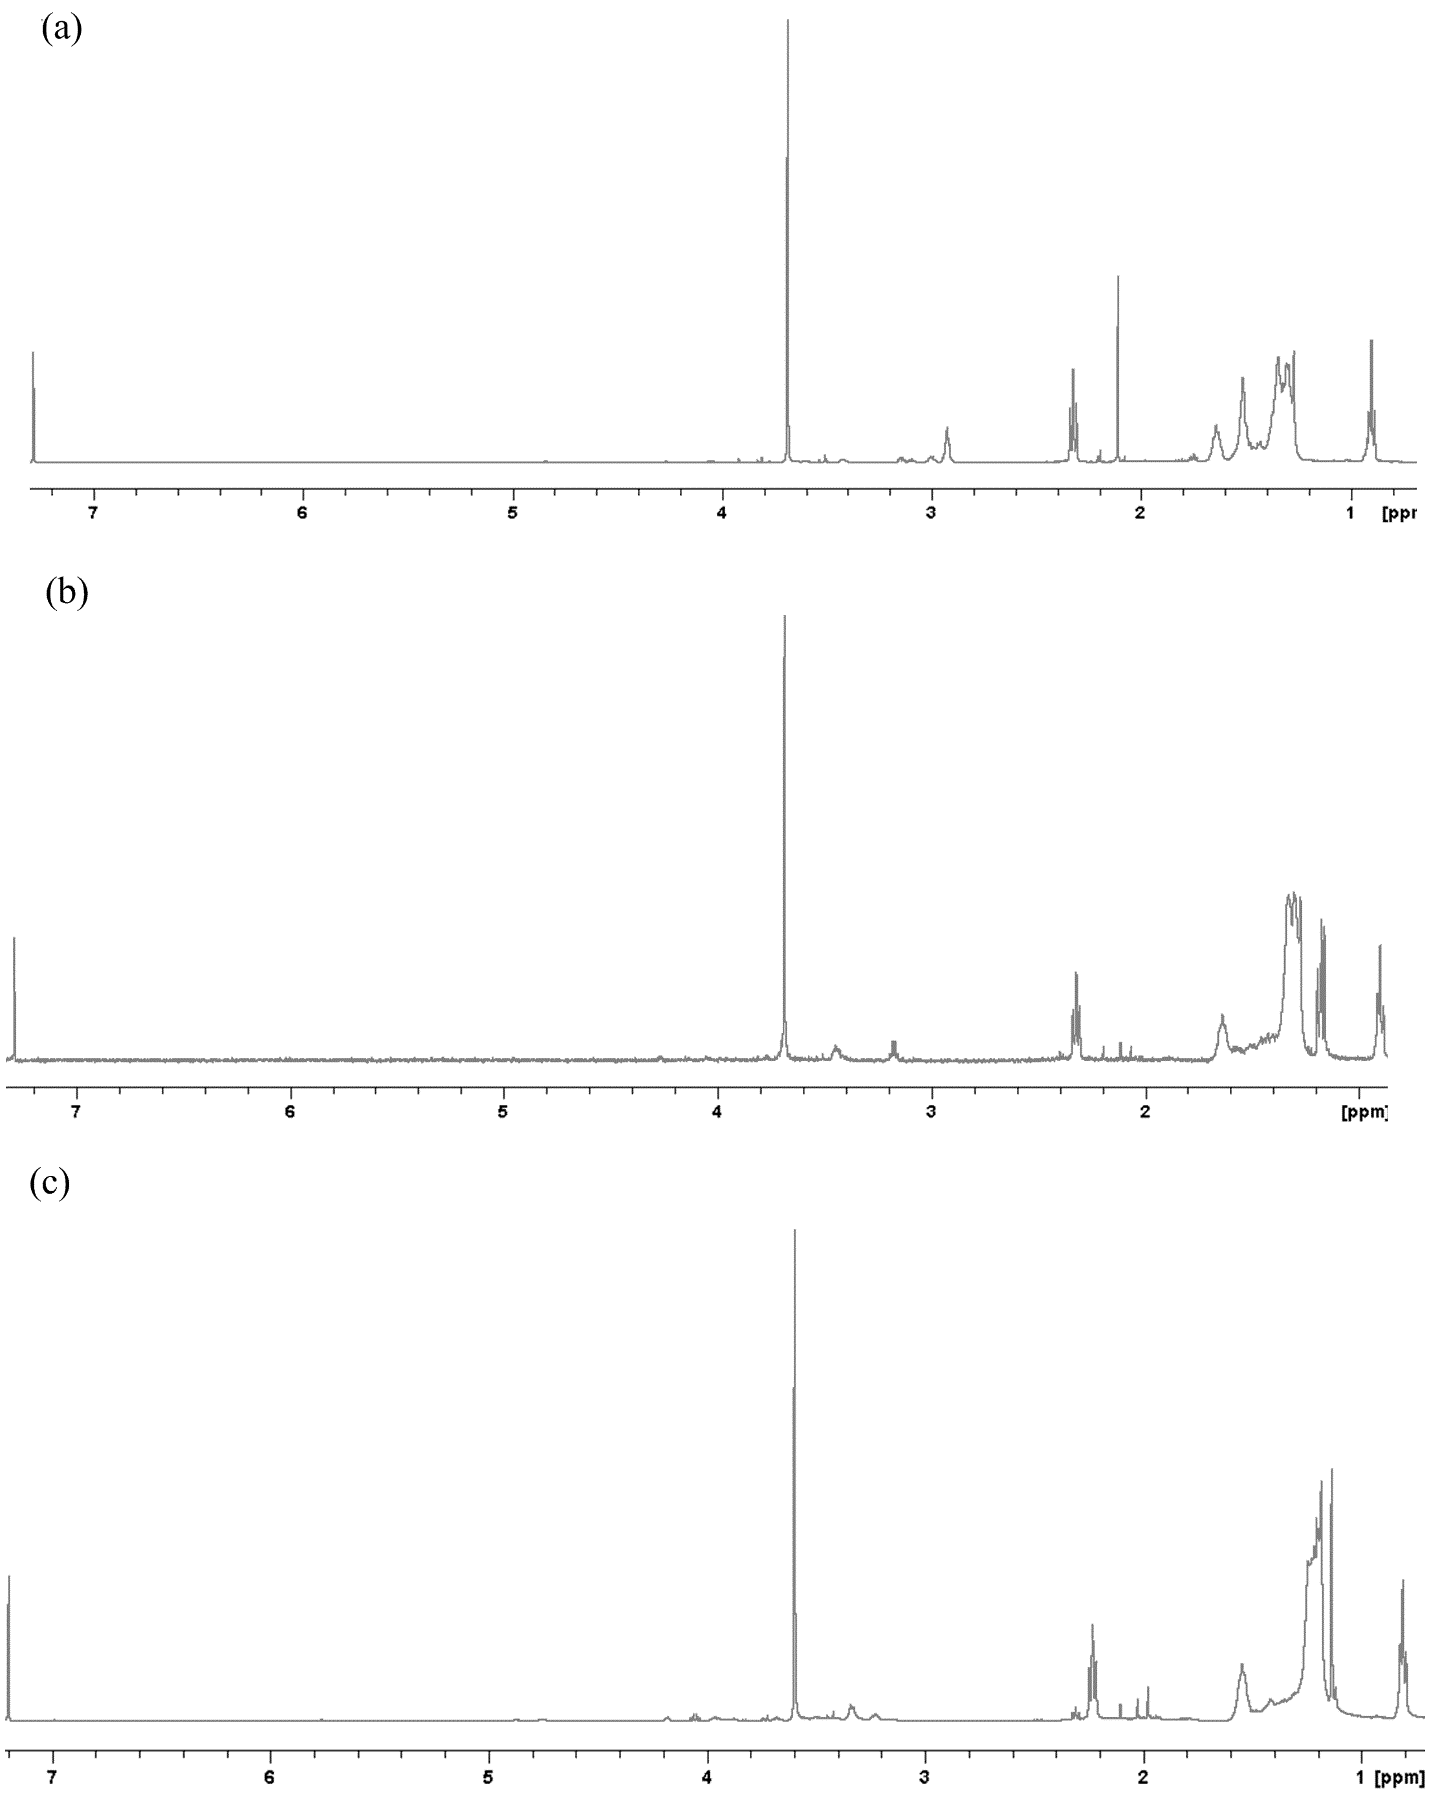


**Figure S2.** 1H NMR spectra of (**a**) Epoxidized canola biodiesel; (**b**) 2-propanol derived canola biodiesel biolubricant basestock and (**c**) tert-butanol derived canola biodiesel biolubricant basestock.

**Table S1.** 1H NMR data for the amount of the protons at each chemical shift for the prepared biolubricant basestocks.

|  | **Amount of the protons at each chemical shift** | |
| --- | --- | --- |
| **Chemical Shift** | **Propylated Canola Oil Biolubricant Basestock (PCOB)** | **Butylated Canola Oil Biolubricant Basestock (BCOB)** |
| δ 0.75–0.97 | 11.31 | 0.9 |
| δ 1.05–1.8 | 84.77 | 76.8 |
| δ 2.2–2.5 | 6.95 | 6.72 |
| δ 2.86–3.04 | 0.24 | 0.78 |
| δ 3.09–3.23 | 0.67 | 0.21 |
| δ 3.36–3.52 | 1.75 | 2.1 |
| δ 3.63–3.74 | 1.12 | 0.47 |
| δ 4.09–4.2 | 1.94 | 2.01 |
| δ 4.32–4.47 | 2 | 2 |
| δ 5.25–5.38 | 0.75 | 0.88 |
| **Chemical Shift** | **Propylated Canola Biodiesel Biolubricant Basestock (PCBB)** | **Butylated Canola Biodiesel Biolubricant Basestock (BCBB)** |
| δ 0.85–0.92 | 2.89 | 3.2 |
| δ 1.3–1.9 | 3.3 | 1.89 |
| δ 1.24–1.38 | 16.98 | 18.62 |
| δ 1.58–1.69 | 2.52 | 2.79 |
| δ 2.28–2.34 | 1.97 | 2.1 |
| δ 3.13–3.19 | 0.42 | 0.28 |
| δ 3.39–3.47 | 0.62 | 0.64 |
| δ 3.66–3.7 | 3 | 3 |
